# Supplementary material for: Caregiver Supervision Practices and Risk of Childhood Unintentional Injury Mortality in Bangladesh
Source: Int J Environ Res Public Health. 2017 May 11;14(5):515. doi: 10.3390/ijerph14050515 (PMC5451966; doi:10.3390/ijerph14050515)

# Supplementary Materials: Caregiver Supervision Practices and Risk of Childhood Unintentional Injury Mortality in Bangladesh

**Khaula Khatlani, Olakunle Alonge, Aminur Rahman, Dewan Md. Emdadul Hoque, Al-Amin Bhuiyan, Priyanka Agrawal and Fazlur Rahman**

**Table S1.** Comparison of proportions of independent variables between controls and alive children under five years of age in the source population

| Characteristics      | Controls ( <i>n</i> = 378)<br><i>n</i> (%) | Alive Children Under Five Years Age ( <i>n</i> = 112,538)<br><i>n</i> (%) | <i>p</i> -Value |
|----------------------|--------------------------------------------|---------------------------------------------------------------------------|-----------------|
| Supervision:         |                                            |                                                                           |                 |
| Yes                  | 82 (21.7)                                  | 20,558 (18.3)                                                             | 0.08            |
| No                   | 296 (78.3)                                 | 91,980 (81.7)                                                             | 0.09            |
| Sex:                 |                                            |                                                                           |                 |
| Female               | 194 (51.3)                                 | 55,313 (49.2)                                                             | 0.4             |
| Male                 | 184 (48.7)                                 | 57,225 (50.8)                                                             | 0.4             |
| Age (years):         |                                            |                                                                           |                 |
| <1                   | 71 (18.8)                                  | 22,134 (19.7)                                                             | 0.7             |
| 1–4                  | 307 (81.2)                                 | 90,404 (80.3)                                                             | 0.7             |
| Socioeconomic index: |                                            |                                                                           |                 |
| Lowest               | 76 (20.1)                                  | 22,920 (20.4)                                                             | 0.9             |
| Low                  | 79 (20.9)                                  | 20,329 (18.0)                                                             | 0.2             |
| Middle               | 82 (21.7)                                  | 22,389 (19.9)                                                             | 0.4             |
| High                 | 75 (19.8)                                  | 22,247 (19.8)                                                             | 0.9             |
| Highest              | 66 (17.5)                                  | 24,653 (21.9)                                                             | 0.03            |

**Table S2.** Comparison of proportions of independent variables between controls and total children under five years age in the source population

| Characteristics      | Controls ( <i>n</i> = 378)<br><i>n</i> (%) | Total Children Under Five Years Age ( <i>n</i> = 112,664)<br><i>n</i> (%) | <i>p</i> -Value |
|----------------------|--------------------------------------------|---------------------------------------------------------------------------|-----------------|
| Supervision:         |                                            |                                                                           |                 |
| Yes                  | 82 (21.7)                                  | 20,569 (18.3)                                                             | 0.09            |
| No                   | 296 (78.3)                                 | 92,095 (81.7)                                                             | 0.09            |
| Sex:                 |                                            |                                                                           |                 |
| Female               | 194 (51.3)                                 | 55,372 (49.1)                                                             | 0.4             |
| Male                 | 184 (48.7)                                 | 57,292 (50.9)                                                             | 0.4             |
| Age (years):         |                                            |                                                                           |                 |
| <1                   | 71 (18.8)                                  | 22,141 (19.7)                                                             | 0.7             |
| 1–4                  | 307 (81.2)                                 | 90,523 (80.3)                                                             | 0.7             |
| Socioeconomic index: |                                            |                                                                           |                 |
| Lowest               | 76 (20.1)                                  | 22,946 (20.4)                                                             | 0.9             |
| Low                  | 79 (20.9)                                  | 20,355 (18.0)                                                             | 0.2             |
| Middle               | 82 (21.7)                                  | 22,413 (19.9)                                                             | 0.4             |
| High                 | 75 (19.8)                                  | 22,270 (19.8)                                                             | 1.0             |
| Highest              | 66 (17.5)                                  | 24,680 (21.9)                                                             | 0.03            |

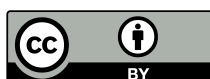

Supplement: Supplementary file 1 [file ijerph-14-00515-s001.pdf]
